# Supplementary material for: A Point-of-Care Nucleic Acid Quantification Method by Counting Light Spots Formed by LAMP Amplicons on a Paper Membrane
Source: MDPI journal article supplement (doi:10.3390/bios14030139), 2024-03-10
Supplement: s1 [file s1]

Table S1 Sequence information used in this paper.

| Name            | Sequence (5' to 3')                            |
|-----------------|------------------------------------------------|
| FIP             | CCACCAGTAGCCGTCAATGGTGAAGATGATCCAGCGACCGAT     |
| BIP             | ACACCAACACGTCGCAAACGGCGTTCTCGTTCGCCAAAT        |
| F3              | ATCGCACCAGCTACTCGA                             |
| B3              | CGGCGAAGAACGTAATGTCT                           |
| LF              | TCGTTTTTTGCCCATTCCCA                           |
| LB              | TTATCCGTCAGCGTTGTGAAGC                         |
| F-FIP           | FAM-CCACCAGTAGCCGTCAATGGTGAAGATGATCCAGCGACCGAT |
| Q-Fd            | CACCATTGACGGCTACTGGTGG-BHQ1                    |
| CrRNA           | UAAUUUCUACUGUUGUAGAUAAUGAAACGGAGCUCCACCAG      |
| ssDNA reporters | FAM-CCCCC-BHQ1                                 |
